# Supplementary material for: High-capacity Si–graphite composite electrodes with a self-formed porous structure by a partially neutralized polyacrylate for Li-ion batteries
Source: Royal Society of Chemistry journal article supplement (doi:10.1039/c2ee22292b), 2012-01-01
Supplement: c2ee22292b.pdf [file c2ee22292b.pdf]

## Supporting Information for

# High Capacity Si / Graphite Composite Electrode Having Self-Formed Porous Structure by Partially Neutralized Polyacrylate for Li-ion Batteries

Zhen-Ji Han,<sup>a</sup> Naoaki Yabuuchi,<sup>a</sup> Keiji Shimomura,<sup>a</sup> Masahiro Murase,<sup>a</sup>  
Hiroharu Yui,<sup>b</sup> and Shinichi Komaba<sup>a\*</sup>

<sup>a</sup>Department of Applied Chemistry, and <sup>b</sup>Department of Chemistry, Tokyo University of  
Science, 1-3 Kagurazaka, Shinjuku, Tokyo 162-8601, Japan

\*corresponding author

e-mail: [komaba@rs.kagu.tus.ac.jp](mailto:komaba@rs.kagu.tus.ac.jp)

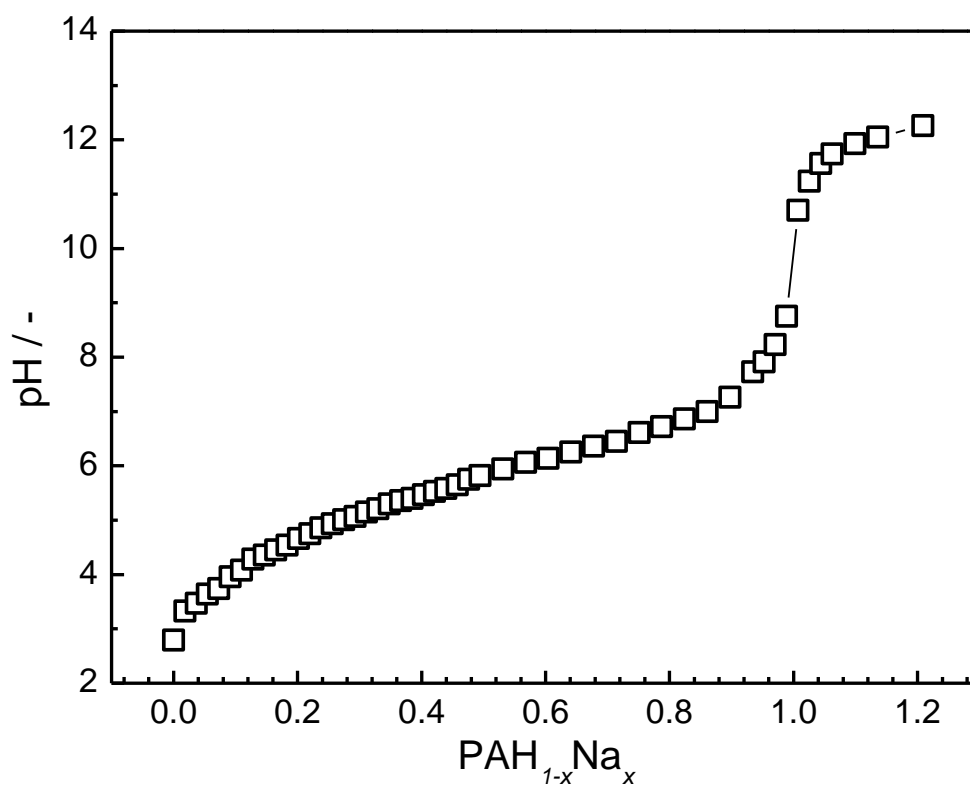

**Figure S1.** Change in pH for the polymer solution as a function of neutralization degrees for PAH. The concentration of PAH was fixed to be 0.005 g / ml.

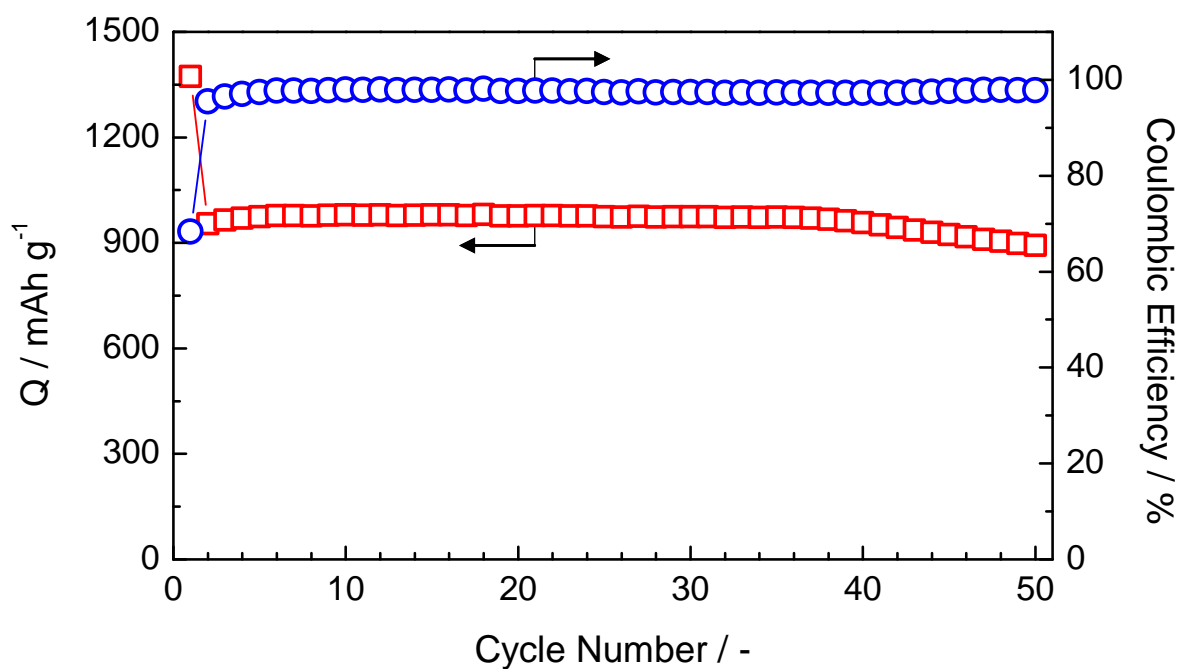

**Figure S2.** Cycleability of PAH<sub>0.2</sub>Na<sub>0.8</sub> electrode in 1 mol dm<sup>-3</sup> LiPF<sub>6</sub> / EC : DMC (1 : 1 by volume) without FEC as the electrolyte additive. The total duration of CC-CV mode was fixed at 10 hours to control the total capacity of 1,000 mAh g<sup>-1</sup> as the maximum. The Si / graphite electrode shows capacity retention over 40 cycle test with the efficiency (approximately 97.8 % at 40<sup>th</sup> cycle).

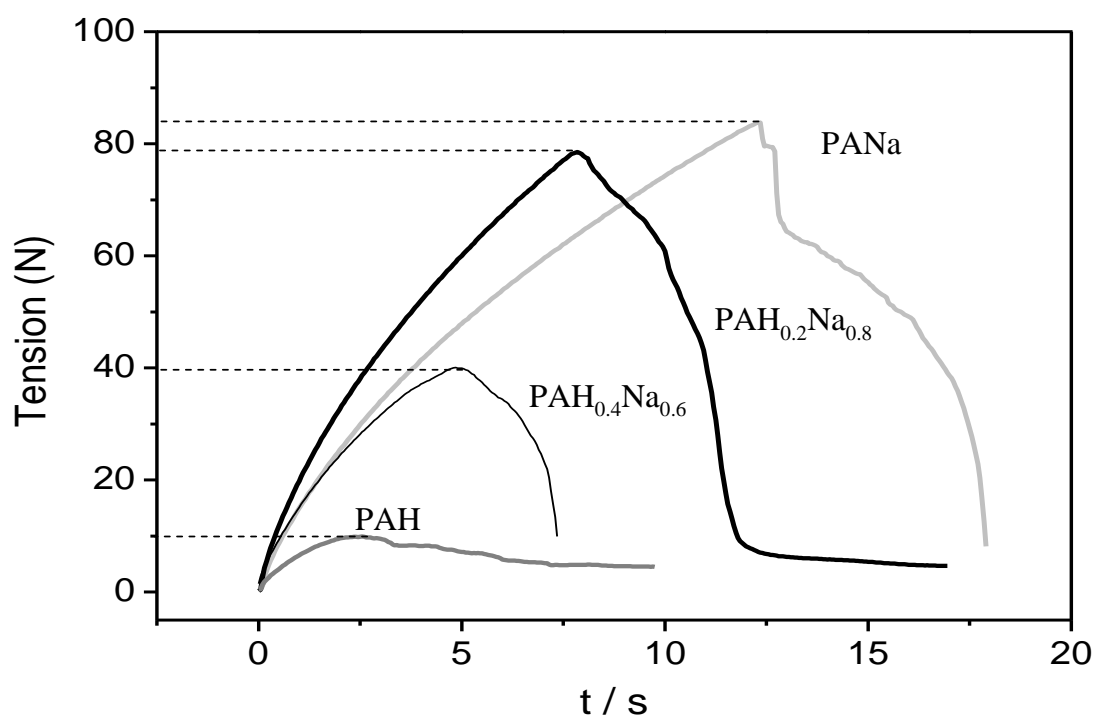

**Figure S3.** Adhesion strength of the Si / Graphite composites with 10 wt% PANa, PAH<sub>0.2</sub>Na<sub>0.8</sub>, PAH<sub>0.4</sub>Na<sub>0.6</sub>, PAH binders to Cu foil.

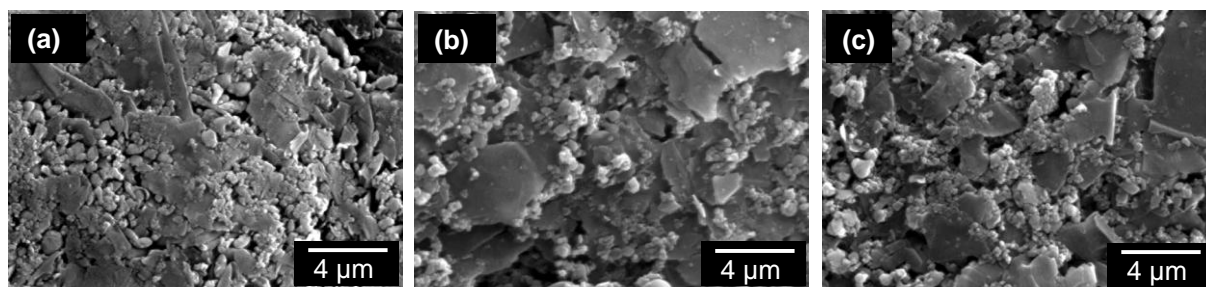

**Figure S4.** SEM images of the Si / graphite composite electrodes with different binders; 10 wt% PAH (a),  $\text{PAH}_{0.2}\text{Na}_{0.8}$  (b) and PANa binders (c). Agglomeration of carbon and silicon is found for PAH, whereas better dispersion of active materials is observed for the neutralized PAH binders.

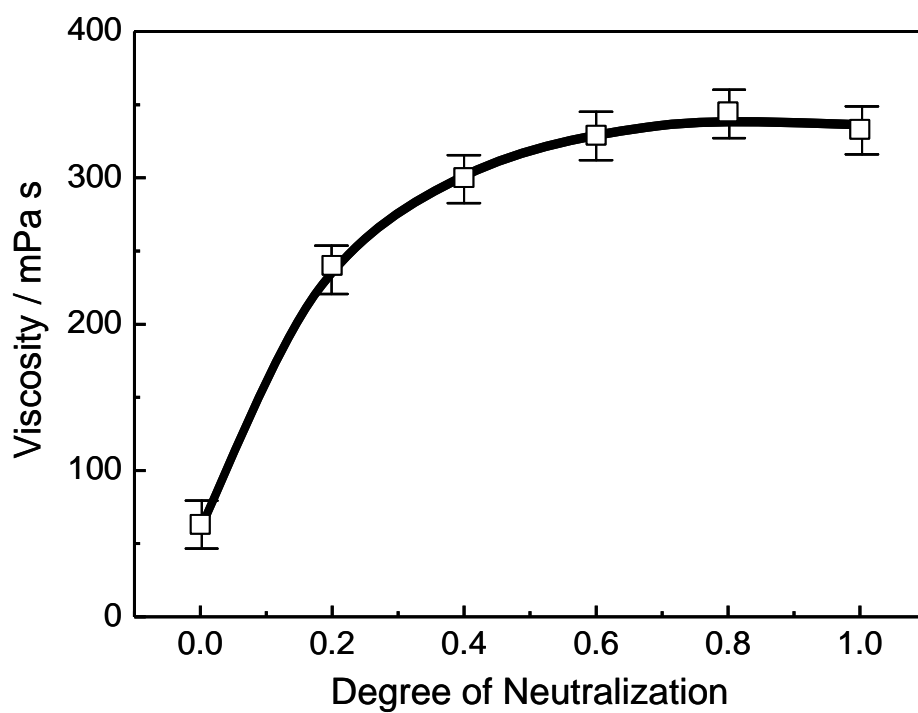

**Figure S5.** Dependency of viscosity on the neutralization degrees for PAH. The concentration of PAH is fixed to be 0.005 g / ml.

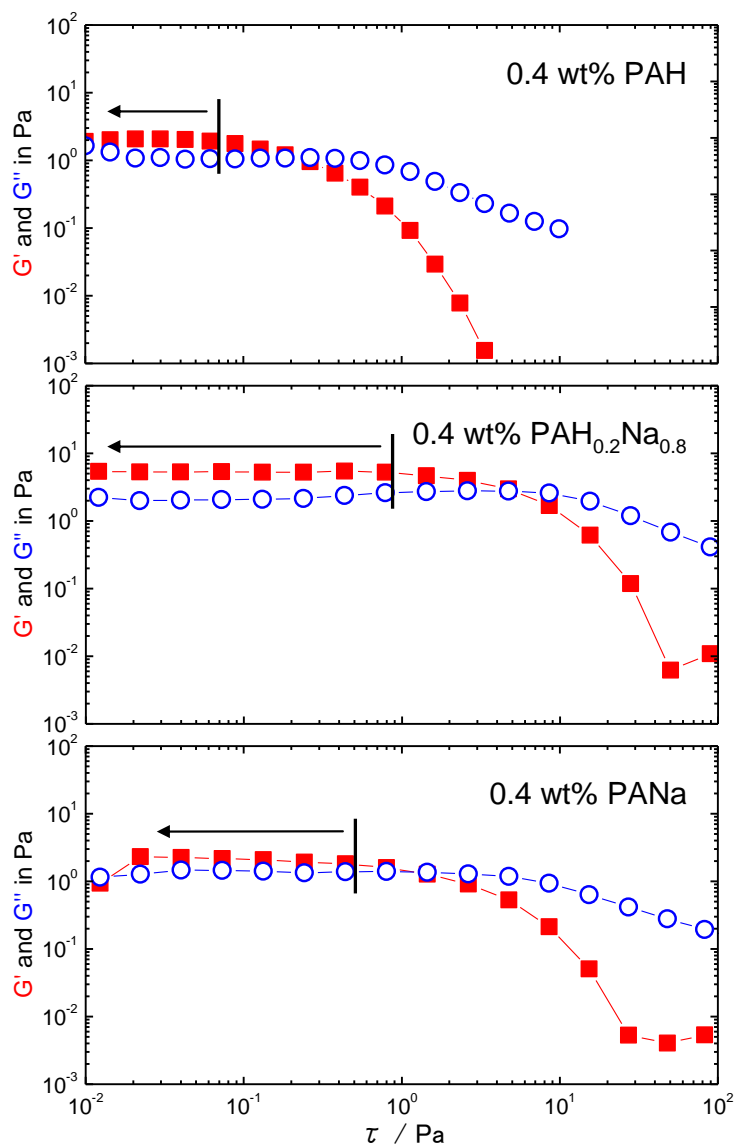

**Figure S6.** The oscillatory stress sweep for 0.4 wt% PAH, PAH<sub>0.2</sub>Na<sub>0.8</sub>, and PANa polymer solution. The linear viscoelastic regions for each solution were observed, which were utilized to decide the maximum pressure for the viscoelastic measurements.
